# Supplementary material for: Evaluation of a validated questionnaire to assess the need for prevention or rehabilitation by preventive health examinations: a cross-sectional study of German employees aged 45 to 59 years (Ü45-check)
Source: Frontiers journal article supplement (doi:10.3389/fpubh.2025.1480312), 2025-07-16
Supplement: Supplementary_file_1.pdf [file Supplementary_file_1.pdf]

Work Ability

1. How long were you on sick leave in the past 12 months?
  - ☐ not at all
  - ☐ 1 day to 6 weeks
  - ☐ more than 6 weeks up to 3 months
  - ☐ more than 3 months up to 6 months
  - ☐ more than 6 months
2. Does any illness or impairment currently interfere with your work?  
*Please tick everything that applies to you. Multiple answers are possible. If you are currently unemployed, refer to your last performed job.*
  - ☐ I have no impairment / I have no illness
  - ☐ I can perform my work, but I have complaints
  - ☐ I'm sometimes forced to work slower or to change my working methods
  - ☐ I'm often forced to work slower or to change my working methods
  - ☐ Because of my illness, I'm only able to work part-time
  - ☐ I can no longer work at all
3. If you think of your current health status and your occupational performance: how do you envision your professional future?  
*Please tick the most applicable option only.*  
I think that in the next 5 years I'll probably...
  - ☐ ...have no severe health impairments that will hinder me from performing at my work place
  - ☐ ... be able to continue my profession, but I will have to change my work place due to health impairments
  - ☐ ... not be able to continue my profession due to health impairments
  - ☐ ... not be able to work at all

|               |
|---------------|
| Mental Health |
|---------------|

4. In the last 4 weeks, how often did you feel impaired by the following complaints?  
*Please put a cross in each line.*

|                                           | not at all               | on single<br>days        | on more<br>than half of<br>the days | almost<br>every day      |
|-------------------------------------------|--------------------------|--------------------------|-------------------------------------|--------------------------|
| Little interest or joy in your activities | <input type="checkbox"/> | <input type="checkbox"/> | <input type="checkbox"/>            | <input type="checkbox"/> |
| Dejection, melancholy, hopelessness       | <input type="checkbox"/> | <input type="checkbox"/> | <input type="checkbox"/>            | <input type="checkbox"/> |
| Nervousness, anxiousness, tension         | <input type="checkbox"/> | <input type="checkbox"/> | <input type="checkbox"/>            | <input type="checkbox"/> |
| Not being able to stop or control worries | <input type="checkbox"/> | <input type="checkbox"/> | <input type="checkbox"/>            | <input type="checkbox"/> |

|                    |
|--------------------|
| Functional Ability |
|--------------------|

5. In the last 4 weeks, to what degree were you able to perform the following?  
*Please put a cross in each line.*

|                                      | without<br>any<br>problems | little<br>difficulties   | great<br>difficulties    | impossible               |
|--------------------------------------|----------------------------|--------------------------|--------------------------|--------------------------|
| Carry a heavy object over 5 meters   | <input type="checkbox"/>   | <input type="checkbox"/> | <input type="checkbox"/> | <input type="checkbox"/> |
| Perform physical work for 30 minutes | <input type="checkbox"/>   | <input type="checkbox"/> | <input type="checkbox"/> | <input type="checkbox"/> |
| Stand for 30 minutes without a break | <input type="checkbox"/>   | <input type="checkbox"/> | <input type="checkbox"/> | <input type="checkbox"/> |
| Climbing a staircase over 3 floors   | <input type="checkbox"/>   | <input type="checkbox"/> | <input type="checkbox"/> | <input type="checkbox"/> |

### Coping Behavior

6. In the last 4 weeks, how well were you able to cope with the following stress situations? *Please put a cross in each line.*

|                                             | very good                | better                   | worse                    | not at all               |
|---------------------------------------------|--------------------------|--------------------------|--------------------------|--------------------------|
| Time and appointment pressure               | <input type="checkbox"/> | <input type="checkbox"/> | <input type="checkbox"/> | <input type="checkbox"/> |
| Conflicts, emotionally stressful situations | <input type="checkbox"/> | <input type="checkbox"/> | <input type="checkbox"/> | <input type="checkbox"/> |
| High responsibility, high demands           | <input type="checkbox"/> | <input type="checkbox"/> | <input type="checkbox"/> | <input type="checkbox"/> |
| Physical load                               | <input type="checkbox"/> | <input type="checkbox"/> | <input type="checkbox"/> | <input type="checkbox"/> |

### Sports and Exercise Behavior

7. In the last 4 weeks, how many hours did you perform the following physical activities? *Please put a cross in each line.*

|                           | 2 hours or more          | 1 hour up to 2 hours     | up to 1 hour             | not at all               |
|---------------------------|--------------------------|--------------------------|--------------------------|--------------------------|
| Physical exercise         | <input type="checkbox"/> | <input type="checkbox"/> | <input type="checkbox"/> | <input type="checkbox"/> |
| Cycling or running        | <input type="checkbox"/> | <input type="checkbox"/> | <input type="checkbox"/> | <input type="checkbox"/> |
| Physical activity at work | <input type="checkbox"/> | <input type="checkbox"/> | <input type="checkbox"/> | <input type="checkbox"/> |
| Activities at home        | <input type="checkbox"/> | <input type="checkbox"/> | <input type="checkbox"/> | <input type="checkbox"/> |
